# Supplementary material
Source: publisher site journal article supplement (https://www.dovepress.com/article/401069)
Supplement: Supplementary file 1 [file get_supplementary_file.php]

**Table S1.** All the primers used for PCR in this study

| Gene | primers sequence (5' –3') | Production size (bp) | Annealing temperature |
| --- | --- | --- | --- |
| **spa typing** | |  |  |
| spa | F: TAAAGACGATCCTTCGGTGAGC | - | 53℃ |
| R: CAGCAGTAGTGCCGTTTGCTT |
| **MLST typing** | |  |  |
| arcC | F: TTGATTCACCAGCGCGTATTGTC | 456 | 55℃ |
| R: AGGTATCTGCTTCAATCAGCG |
| aroE | F: ATCGGAAATCCTATTTCACATTC | 456 | 55℃ |
| R: GGTGTTGTATTAATAACGATATC |
| tpi | F: TCGTTCATTCTGAACGTCGTGAA | 402 | 55℃ |
| R: TTTGCACCTTCTAACAATTGTAC |
| glpF | F: CTAGGAACTGCAATCTTAATCC | 465 | 55℃ |
| R: TGGTAAAATCGCATGTCCAATTC |
| gmk | F: ATCGTTTTATCGGGACCATC | 429 | 55℃ |
| R: TCATTAACTACAACGTAATCGTA |
| pta | F: GTTAAAATCGTATTACCTGAAGG | 474 | 55℃ |
| R: GACCCTTTTGTTGAAAAGCTTAA |
| yqiL | F: CAGCATACAGGACACCTATTGGC | 516 | 55℃ |
| R: CGTTGAGGAATCGATACTGGAAC |
| **virulence genes** | |  |  |
| hla | F: CTGATTACTATCCAAGAAATTCGATTG | 209 | 58°C |
| R: CTTTCCAGCCTACTTTTTTATCAGT |
| hlb | F: GTGCACTTACTGACAATAGTGC | 309 | 58°C |
| R: GTTGATGAGTAGCTACCTTCAGT |
| hld | F: AAGAATTTTTATCTTAATTAAGGAAGGAGTG | 111 | 56°C |
| R: TTAGTGAATTTGTTCACTGTGTCGA |
| hlg | F: GTCAYAGAGTCCATAATGCATTTAA | 535 | 56°C |
| R: CACCAAATGTATAGCCTAAAGTG |
| clfA | F: ATTGGCGTGGCTTCAGTGCT | 292 | 57°C |
| R: CGTTTCTTCCGTAGTTGCATTTG |
| clfB | F: AGTCTTGCAGTTGCTGAACC | 957 | 55°C |
| R: TTTACCTGTCGCTGGGTCAAT |
| fnbA | F: GTGAAGTTTTAGAAGGTGGAAAGATTAG | 643 | 57°C |
| R: GCTCTTGTAAGACCATTTTTCTTCAC |
| fnbB | F: GTAACAGCTAATGGTCGAATTGATACT | 524 | 57°C |
| R: CAAGTTCGATAGGAGTACTATGTTC |
| sea | F: GAAAAAAGTCTGAATTGCAGGGAACA | 560 | 55°C |
| R: CAAATAAATCGTAATTAACCGAAGGTTC |
| seb | F: ATTCTATTAAGGACACTAAGTTAGGGA | 404 | 57°C |
| R: ATCCCGTTTCATAAGGCGAGT |
| sec | F: GTAAAGTTACAGGTGGCAAAACTTG | 297 | 57°C |
|  | R: CATATCATACCAAAAAGTATTGCCGT |  |  |
| eta | F: ACTGTAGGAGCTAGTGCATTTGT | 190 | 57°C |
| R: TGGATACTTTTGTCTATCTTTTTCATCAAC |
| etb | F: CAGATAAAGAGCTTTATACACACATTAC | 612 | 56°C |
| R: AGTGAACTTATCTTTCTATTGAAAAACACTC |
| pvl | F: ATCATTAGGTAAAATGTCTGGACATGATCCA | 433 | 56°C |
| R: GCATCAASTGTATTGGATAGCAAAAGC |
| lukED | F: TGAAAAAGGTTCAAAGTTGATACGAG | 269 | 56°C |
| R: TGTATTCGATAGCAAAAGCAGTGCA |
| sdrC | F: CGCATGGCAGTGAATACTGTTGCAGC | 725 | 57°C |
| R: GAAGTATCAGGGGTGAAACTATCCACAAATT |
| sdrD | F: CACTGGAAATAAAGTTGAAGTTTCAACTGCC | 467 | 57°C |
| R: CCTGATTTAACTTTGTCATCAACTGTAATTTGTG |
| sdrE | F: GCAGCAGCGCATGACGGTAAAG | 894 | 57°C |
| R: GTCGCCACCGCCAGTGTCATTA |
| **mecA gene** | |  |  |
| mecA | F: AAAATCGATGGTAAAGGTTGGC | 533 | 56°C |
| R: AGTTCTGCAGTACCGCATTTGC |

| **Table S2** The frequencies of virulence genes among *S. aureus*, MRSA and MSSA isolates | | | | | | | | | |
| --- | --- | --- | --- | --- | --- | --- | --- | --- | --- |
| virulence genes | BEFORE-Total | AFTER-Total | *P*-value a | BEFORE-MRSA | AFTER-MRSA | *P*-value b | BEFORE-MSSA | AFTER-MSSA | *P*-value c |
| n=309 | n=310 |  | n=131 | n=136 | n=178 | n=174 |
| *hla* | 92.6% | 93.5% | 0.628 | 93.1% | 97.1% | 0.136 | 92.1% | 90.8% | 0.655 |
| *hlb* | 74.1% | 96.5% | <0.001 | 84.7% | 100.0% | <0.001 | 66.3% | 93.7% | <0.001 |
| *hld* | 98.4% | 89.7% | <0.001 | 98.5% | 89.7% | 0.003 | 98.3% | 89.7% | 0.001 |
| *hlg* | 83.5% | 94.5% | <0.001 | 81.7% | 92.6% | 0.007 | 84.8% | 96.0% | <0.001 |
| *clfA* | 100.0% | 99.4% | - | 100.0% | 100.0% | - | 100.0% | 98.9% | - |
| *clfB* | 79.6% | 84.2% | 0.139 | 72.5% | 80.1% | 0.142 | 84.8% | 87.4% | 0.494 |
| *fnbA* | 10.0% | 10.6% | 0.802 | 16.8% | 16.9% | 0.979 | 7.3% | 5.7% | 0.555 |
| *fnbB* | 33.0% | 46.1% | 0.001 | 25.2% | 41.9% | 0.004 | 38.8% | 49.4% | 0.044 |
| *sea* | 9.7% | 15.8% | 0.023 | 10.7% | 14.7% | 0.325 | 9.0% | 16.7% | 0.031 |
| *seb* | 37.5% | 63.5% | <0.001 | 32.8% | 64.0% | <0.001 | 41.0% | 63.2% | <0.001 |
| *sec* | 23.3% | 10.6% | <0.001 | 41.2% | 12.5% | <0.001 | 10.1% | 9.2% | 0.771 |
| *eta* | 3.2% | 2.6% | 0.627 | 2.3% | 2.9% | 1.000 | 3.9% | 2.3% | 0.378 |
| *etb* | 8.4% | 12.9% | 0.070 | 4.6% | 11.0% | 0.050 | 11.2% | 14.4% | 0.379 |
| *pvl* | 39.2% | 58.1% | <0.001 | 42.0% | 57.4% | 0.012 | 37.1% | 58.6% | <0.001 |
| *lukED* | 73.5% | 75.5% | 0.564 | 71.8% | 74.3% | 0.644 | 74.7% | 76.4% | 0.708 |
| *sdrC* | 48.5% | 35.8% | 0.001 | 62.6% | 59.6% | 0.611 | 38.2% | 17.2% | <0.001 |
| *sdrD* | 70.9% | 70.6% | 0.950 | 75.6% | 77.2% | 0.753 | 67.4% | 65.5% | 0.706 |
| *sdrE* | 87.4% | 97.7% | <0.001 | 93.9% | 96.3% | 0.356 | 82.6% | 98.9% | <0.001 |

a The positive rates of virulence genes among BEFORE *S. aureus* isolates were compared with those among AFTER *S. aureus* isolates. b The positive rates of virulence genes among BEFOREMRSA isolates were compared with those among AFTER MRSA isolates. c The positive rates of virulence genes among BEFOREMSSA isolates were compared with those among AFTER MSSA isolates.
